# Supplementary material for: The Chromatin-Oxygen Sensor Gene KDM5C Associates with Novel Hypoxia-Related Signatures in Glioblastoma Multiforme
Source: Int J Mol Sci. 2022 Sep 6;23(18):10250. doi: 10.3390/ijms231810250 (PMC9498997; doi:10.3390/ijms231810250)
Supplement: Supplementary file 1 [file ijms-23-10250-s001.zip]

Archive with 5 entries (5 files):
- Supplementary Data.pdf
- Table S1.pdf
- Table S2.xlsx
- Table S3.xlsx
- Table S4.pdf
