# Supplementary material for: The Chromatin-Oxygen Sensor Gene KDM5C Associates with Novel Hypoxia-Related Signatures in Glioblastoma Multiforme
Source: Int J Mol Sci. 2022 Sep 6;23(18):10250. doi: 10.3390/ijms231810250 (PMC9498997; doi:10.3390/ijms231810250)
Supplement: Supplementary file 1 [file ijms-23-10250-s001.zip › Table S1.pdf]

**Table S1. Clinico-pathological characteristics of *KDM5C*<sup>Low</sup> and *KDM5C*<sup>High</sup> cohorts.**

| GBM cohort                              | Age (Years)<br>No; % |             | Gender      |           | Tumor location<br>(Hemisphere) |             |         | Lesion<br>number |          | Epilepsy   |             | MGMT<br>methylation |            | IDH1/2<br>mutation |             | Chemotherapy |           | Radiotherapy |            | Survival<br>rate |
|-----------------------------------------|----------------------|-------------|-------------|-----------|--------------------------------|-------------|---------|------------------|----------|------------|-------------|---------------------|------------|--------------------|-------------|--------------|-----------|--------------|------------|------------------|
|                                         | <50                  | >50         | M           | F         | Right                          | Left        | Others  | S                | M        | Yes        | No          | Yes                 | No         | WT                 | Mut         | Yes          | No        | Yes          | No         |                  |
| <i>KDM5C</i> <sup>Low</sup>             | 5<br>13.5%           | 11<br>29.7% | 9<br>24.3%  | 7<br>19%  | 7<br>19%                       | 6<br>16.4%  | 3<br>8% | 13<br>35%        | 3<br>8%  | 6<br>16.2% | 10<br>27%   | 15<br>40.5%         | 1<br>2.7%  | 6<br>16.2%         | 10<br>27.1% | 14<br>38%    | 2<br>5.3% | 11<br>30%    | 5<br>13.5% | 53%              |
| <i>KDM5C</i> <sup>High</sup>            | 5<br>13.5%           | 16<br>43.3% | 11<br>29.7% | 10<br>27% | 10<br>27%                      | 11<br>29.7% | 0       | 20<br>54%        | 1<br>3%  | 7<br>18.9% | 14<br>37.9% | 18<br>48.8%         | 3<br>8%    | 8<br>21.6%         | 13<br>35.1% | 20<br>54%    | 1<br>2.7% | 18<br>48.5%  | 3<br>8%    | 40%              |
| Total No                                | 10<br>27%            | 27<br>73%   | 20<br>54%   | 17<br>46% | 17<br>45.9%                    | 17<br>45.9% | 3<br>8% | 33<br>89%        | 4<br>11% | 13<br>35%  | 24<br>65%   | 33<br>89.1%         | 4<br>10.9% | 14<br>38%          | 23<br>62%   | 34<br>92%    | 3<br>8%   | 29<br>78.3%  | 8<br>21.7% |                  |
| <i>p</i> -value<br>(Chi Square<br>test) | 0.65                 |             | 0.81        |           | 0.72                           |             |         | 0.29             |          | 0.99       |             | 0.43                |            | 0.39               |             | 0.56         |           | 0.76         |            | 0.82             |

M, male; F, female; WT, wild-type; Mut, Mutation; +, positive; -, negative; S, single; M, multifocal; p-value <0.05
