# Supplementary material for: The Chromatin-Oxygen Sensor Gene KDM5C Associates with Novel Hypoxia-Related Signatures in Glioblastoma Multiforme
Source: Int J Mol Sci. 2022 Sep 6;23(18):10250. doi: 10.3390/ijms231810250 (PMC9498997; doi:10.3390/ijms231810250)
Supplement: Supplementary file 1 [file ijms-23-10250-s001.zip › Table S2.xlsx]

## Sheet: Sheet1
Table S2. Genes consistently regulated by methylation changes and analysed by Panther classification system
Gene name	Accession number	Protein name	Accession number	Function	Cancer	Brain disorder	Reference
Adaptor related protein complex 1 subunit gamma 1 (AP1G1)	NM_001030007.2	AP-1 complex subunit gamma-1	NP_001025178.1	Intracellular vesicular trafficking	Colorectal cancer	Intellectual disability and epilepsy; Neurodevelopmental disorder (NDD)	Usmani et al. 2021
AT-rich interaction domain 1A (ARID1A)	NM_006015	AT-rich interactive domain-containing protein 1A	NP_006006.3	Transcriptional regulation/Chromatin enzyme	Hepatocellular carcinoma	Coffin-Siris syndrome 2; Neurodevelopmental disorder (NDD)	Feng et al. 2022
AT-rich interaction domain 1B (ARID1B)	NM_017519	AT-rich interactive domain-containing protein 1B	NP_059989.3	Transcriptional regulation/Chromatin enzyme	Ovarian clear cell carcinoma	Coffin-Siris syndrome 1; Neurodevelopmental disorder (NDD)	Sato et al. 2018
Activator of transcription and developmental regulator AUTS2 (AUTS2)	NM_015570	Autism susceptibility gene 2 protein	NP_056385.1	Chromatin remodelling	Acute lymphoblastic leukemia	Autism and intellectual disability; Neurodevelopmental disorder (NDD)	Hori et al. 2021
Beta-transducin repeat containing E3 ubiquitin protein ligase (BTRC)	NM_033637.4	F-box/WD repeat-containing protein 1A	NP_378663.1	Ubiquitination and proteasomal degradation	Colorectal cancer	NT	Zheng et al. 2020
Nuclear cap binding subunit 3 (C17orf85)	NM_001114118.3	Nuclear cap-binding protein subunit 3	NP_001107590.1	mRNA biogenesis	Low and High Grade Gliomas	NT	Li et al. 2021
CDC like kinase 2 (CLK2)	NM_001294338.2	Dual specificity protein kinase CLK2	NP_001281267.1	RNA splicing	Glioblastoma	Autism; Neurodevelopmental disorder (NDD)	Park et al. 2016
Casein kinase 2 alpha 2 (CSNK2A2)	NM_001896.4	Casein kinase II subunit alpha	NP_001887.1	Cell cycle/P53 signaling	Glioblastoma	Okur-Chung neurodevelopmental syndrome; Neurodevelopmental disorder (NDD)	Rowse et al. 2017
DGCR8 microprocessor complex subunit (DGCR8)	NM_022720.7	Microprocessor complex subunit DGCR8	NP_073557.3	MicroRNA processing/Stem cell differentiation	Lung, breast, renal, hepatocellular cancer	DiGeorge syndrome	Sellier et al. 2014
Drosha ribonuclease III (DROSHA)	NM_013235.5	Ribonuclease 3	NP_037367.3	MicroRNA processing/Stem cell differentiation	Lung, breast, renal, hepatocellular cancer	Parkinson disease	Wang et al. 2018
Dishevelled segment polarity protein 1 (DVL1)	NM_001330311.2	Segment polarity protein dishevelled homolog DVL-1	NP_001317240.1	Cell cycle	Rhabdomiosarcoma	NT	Pruller et al 2022
Dishevelled segment polarity protein 3 (DVL3)	NM_004423.4	Segment polarity protein dishevelled homolog DVL-3	NP_004414.3	Cell cycle	Rhabdomiosarcoma	NT	Pruller et al 2022
ELAV like RNA binding protein 1 (ELAVL1)	NM_001419.3	ELAV-like protein 1	NP_001410.2	mRNA stability/Response to Hypoxia	Colorectal cancer	NT	Li et al. 2020
FUS RNA binding protein (FUS)	NM_004960.4	RNA-binding protein FUS	NP_004951.1	Metabolism of RNA	Prostate cancer	Amyotrophic lateral sclerosis	Jutzi et al. 2021
G2 and S-phase expressed 1 (GTSE1)	NM_016426.7	G2 and S phase-expressed protein 1	NP_057510.5	Cell cycle/P53 signaling	Breast cancer	NT	Lin et al. 2019
Heterogeneous nuclear ribonucleoprotein F (HNRNPF)	NM_001098204.2	Heterogeneous nuclear ribonucleoprotein F	NP_001091674.1	RNA splicing	Bladder cancer	Amyotrophic lateral sclerosis	Li et al. 2019
Inner membrane mitochondrial protein (IMMT)	NM_006839.3	MICOS complex subunit MIC60	NP_006830.2	Mitochondria christae morphology/Resposne to hypoxia	Lung adenocarcinoma	Mitochondrial developmental encephalopathy; Neurodevelopmental disorder (NDD)	Marco-Hernandez et al. 2021
Integrator complex subunit 1 (INTS1)	NM_001080453.3	Integrator complex subunit 1	NP_001073922.2	RNA processing	Pan Cancer Analysis	Neurodevelopmental disorder with cataracts, poor growth, and dysmorphic facies (NDD)	Zhang et al. 2019; Federico et al. 2017
KAT8 regulatory NSL complex subunit 1 (KANSL1)	NM_001193466.2	KAT8 regulatory NSL complex subunit 1	NP_001180394.1	Chormatin organization	Ovarian cancer	Koolen-de Vries syndrome; Neurodevelopmental disorder (NDD)	Fejzo et al. 2021
Kinesin family member 14 (KIF14)	NM_014875.3	Kinesin-like protein KIF14	NP_055690.1	Cell Cycle/P53 signaling	Cervical cancer	Microcephaly 20, primary, autosomal recessive; Neurodevelopmental disorder (NDD)	Xiao et al. 2021
Lysine methyltransferase 2A (KMT2A)	NM_001197104.2	Histone-lysine N-methyltransferase 2A	NP_001184033.1	Chromatin remodelling/Chromatin enzyme	Cervical cancer	Wiedemann-Steiner syndrome; Neurodevelopmental disorder (NDD)	Zhang et al. 2020
Karyopherin subunit beta 1 (KPNB1)	NM_002265.6	Importin subunit beta-1	NP_002256.2	Cell Cycle/IL-6 signaling	Glioblastoma	NT	Chuan-Zu et al. 2018
Mitochondrial ribosomal protein S5 (MRPS5)	NM_031902.5	28S ribosomal protein S5, ribosomal	NP_114108.1	Ribosomal translation	NT	NT	Xing et al. 2020
Nucleolin (NCL)	NM_005381.3	Nucleolin	NP_005372.2	RNA splicing/Inflammatory response	Prostate cancer	Purkinje cell (PC) degeneration	Firlej et al. 2022
Nuclear receptor coactivator 6 (NCOA6)	NM_014071.5	Nuclear receptor coactivator 6	NP_054790.2	Cell Cycle	Gastric cancer	NT	Chen et al. 2011
NIPBL cohesin loading factor (NIPBL)	NM_133433.4	Nipped-B-like protein	NP_597677.2	Cell Cycle	Non-small cell lung cancer	Cornelia de Lange syndrome; Neurodevelopmental disorder (NDD)	Panarotto et al. 2022
Nuclear receptor subfamily 2 group C member 2 (NR2C2)	NM_003298.5	Nuclear receptor subfamily 2 group C member 2	NP_003289.2	Cell Cycle	Cervical cancer	NT	Zhang et al. 2019
NOP2/Sun RNA methyltransferase 6 (NSUN6)	NM_182543.5	tRNA (cytosine(72)-C(5))-methyltransferase NSUN6	NP_872349.1	Metabolism of RNA	Glioblastoma	Alzheimer's disease and Traumatic Brain Injury	Awah et al. 2021
Nuclear VCP like (NVL)	NM_002533.4	Nuclear valosin-containing protein-like	NP_002524.2	rRNA processing	Prostate cancer	Schizophrenia	Zhao et al. 2016
Polo like kinase 4 (PLK4)	NM_014264.5	Serine/threonine-protein kinase PLK4	NP_055079.3	Cell Cycle/Response to hypoxia	Breast cancer	Microcephaly and chorioretinopathy; Neurodevelopmental disorder (NDD)	Kazazian et al. 2017
DNA polymerase iota (POLI)	NM_007195.3	DNA polymerase iota	NP_009126.2	Error-prone DNA polymerase involved in DNA repair	Esophageal squamous cell carcinoma	NT	He et al. 2017
RNA polymerase I subunit B (POLR1B)	NM_019014.6	DNA-directed RNA polymerase I subunit RPA2	NP_061887.2	Transcription of ribosomal RNA (rRNA) genes/Inflammatory response	Non‑small cell lung cancer	Treacher Collins syndrome type 4; Neurodevelopmental disorder (NDD)	Sanchez et al. 2020
Protein phosphatase 6 regulatory subunit 2 (PPP6R2)	NM_001242898.2	Serine/threonine-protein phosphatase 6 regulatory subunit 2	NP_001229827.1	Mitotic kinase	NT	NT	Nasa & Kettenbach 2018
pre-mRNA processing factor 40 homolog A (PRPF40A)	NM_001365597.4	pre-mRNA processing factor 40 homolog A	NP_001352526.1	mRNA processing/Response to hypoxia	Pancreatic cancer	NT	Huo et al. 2019
Polypyrimidine tract binding protein 2 (PTBP2)	NM_021190.4	Polypyrimidine tract-binding protein 2	NP_067013.1	mRNA splicing	Glioblastoma	NT	Kim et al. 2021
Protein tyrosine phosphatase non-receptor type 23 (PTPN23)	NM_015466.4	Protein tyrosine phosphatase non-receptor type 23	NP_056281.1	mRNA splicing	Hepatocellular carcinoma	Neurodevelopmental disorder and structural brain anomalies with or without seizures and spasticity (NDD)	Sowada et al. 2017
REV3 like, DNA directed polymerase zeta catalytic subunit (REV3L)	NM_001372078.1	DNA polymerase zeta catalytic subunit	NP_001359007.1	DNA repair/P53 signaling	Non-small cell lung cancer	Moebius syndrome	Wang et al. 2015
REX4 homolog, 3'-5' exonuclease (REXO4)	NM_020385.4	RNA exonuclease 4	NP_065118.2	Involved in DNA catabolic process	Hepatocellular carcinoma	NT	Chen et al. 2021
Replication factor C subunit 1 (RFC1)	NM_002913.5	Replication factor C subunit 1	NP_002904.3	DNA repair	Breast cancer	Cerebellar ataxia	Cortese et al., 2020
Remodeling and spacing factor 1 (RSF1)	NM_016578.4	Remodelling and spacing factor 1	NP_057662.3	Chromatin remodelling/P53 signaling	Cervical cancer	NT	Wang et al. 2018
Scm polycomb group protein homolog 1 (SCMH1)	NM_001394311.1	Scm polycomb group protein homolog 1	NP_001381240.1	Chromatin remodelling	NT	NT	Ohutsubo et al. 2008
SIN3 transcription regulator family member A (SIN3A)	NM_001145358.2	Paired amphipathic helix protein Sin3a	NP_001138830.1	Regulation of transcription/Chromatin enzyme	Breast cancer	Witteveen-Kolk syndrome; Neurodevelopmental disorder (NDD)	Witteveen et al. 2016
Solute carrier family 38 member 7 (SLC38A7)	NM_018231.3	Putative sodium-coupled neutral amino acid transporter 7	NP_060701.1	Amino acid transmembrane transport and sodium ion transport	Lung Squamous Cell Carcinoma	NT	Haratake et al. 2021
SWI/SNF related, matrix associated, actin dependent regulator of chromatin, subfamily a, member 5 (SMARCA5)	NM_003601.4	SWI/SNF-related matrix-associated actin-dependent regulator of chromatin subfamily A member 5	NP_003592.3	Chromatin remodelling/P53 signaling	NT	Syndromic neurodevelopmental disorder (NDD)	Li et al. 2021
Thyroid hormone receptor associated protein 3 (THRAP3)	NM_005119.4	Thyroid hormone receptor-associated protein 3	NP_005110.2	RNA processing	Sarcoma	NT	Spalato et al. 2022
Ubiquitin associated protein 2 like (UBAP2L)	NM_014847.4	Ubiquitin associated protein 2 like	NP_055662.3	Ubiquitin pathway	Gastric cancer	NT	Li et al. 2022
Voltage dependent anion channel 2 (VDAC2)	NM_001391963.1	Voltage-dependent anion-selective channel protein 2	NP_001378892.1	Glycolytic regulator	Glioblastoma	NT	Zhou et al. 2018
WAPL cohesin release factor (WAPAL)	NM_015045.5	Wings apart-like protein homolog	NP_055860.1	Cell Cycle/P53 signaling	Cervical Cancer	NT	Oikawa et al. 2004
WD repeat domain 3 (WDR3)	NM_006784.3	WD repeat-containing protein 3	NP_006775.1	Metabolism of RNA	Pancreatic cancer	NT	Su et al. 2021
Zinc finger protein 687 (ZNF687)	NM_020832.3	Zinc finger protein 687	NP_065883.1	Bone differentiation and development	Paget disease of bone-6/malignant giant cell tumor of the bone	NT	Divisato et al. 2016
ZW10 interacting kinetochore protein (ZWINT)	NM_007057.4	ZW10 interactor	NP_008988.2	Cell Cycle/Response to hypoxia	Glioblastoma	NT	Yang et a. 2020
NT, not determined
