# Supplementary material for: The Chromatin-Oxygen Sensor Gene KDM5C Associates with Novel Hypoxia-Related Signatures in Glioblastoma Multiforme
Source: Int J Mol Sci. 2022 Sep 6;23(18):10250. doi: 10.3390/ijms231810250 (PMC9498997; doi:10.3390/ijms231810250)
Supplement: Supplementary file 1 [file ijms-23-10250-s001.zip › Table S3.xlsx]

## Sheet: Foglio1
Table S3. GBM patients, tumor features, treatment characteristics and outcomes.
Patients ID #	Gender	Age	Tumor location	Epilepsy	Lesion number	Surgical approach	Radiotherapy	Chemotherapy	p53 expression	% KI67	MGMT methylation status	IDH1/2 mutations
1	F	40	Right Parietal	NO	1	Total resection	YES	YES	0.7	0.45	NO	Mutated
2	F	78	Left Temporo- Parieto- Occipital	NO	1	Total resection (awake surgery)	YES	YES	0.25	0.25	YES	Mutated
4	F	50	Right Parieto - Occipital	YES	1	Total resection	YES	YES	0.5	0.35	NO	Mutated
8	M	50	Right Rolandic	YES	1	Total resection	NO	YES	0.2	0.23	NO	Wild type
9	M	52	Left Frontal	YES	1	Total resection	NO	YES	Negative	0.3	YES	Wild type
10	F	66	Rgith Temporo - Parietal	NO	1	Total resection	YES	YES	0.4	0.4	YES	Mutated
12	M	53	Right Frontal	NO	1	Total resection	YES	YES	Negative	0.3	YES	Mutated
13	F	55	Right Rolandic	YES	1	Total resection	YES	YES	Negative	0.3	YES	Mutated
14	M	50	Left Temporal	NO	1	Total resection	YES	YES	0.8	0.4	YES	Mutated
15	M	64	Left Parietal	NO	1	Total resection	YES	YES	0.1	0.35	NO	Mutated
19	M	62	Left Fronto - Temporal	NO	1	Total resection	YES	YES	0.5	0.25	YES	Mutated
21	F	54	Left Fronto -Temporo - Parietal	NO	1	Total resection	NO	YES	0.1	0.7	YES	Wild type
25	F	55	Right Parietal	NO	1	Total resection	YES	YES	0.8	0.4	YES	Mutated
26	F	73	Left Temporal	NO	1	Total resection	YES	YES	0.35	0.4	YES	Mutated
27	M	44	Other	NO	1	Total resection	NO	NO	0.1	0.5	YES	Wild type
28	M	46	Right Temporo - Parietal	YES	1	Total resection	YES	YES	0.05	0.2	YES	Mutated
30	M	83	Right Frontal	YES	1	Total resection	NO	YES	0.7	0.45	YES	Mutated
31	M	57	Right Frontal	YES	1	Total resection	NO	YES	Negative	0.45	YES	Mutated
32	M	53	Left Rolandic	YES	1	Total resection	YES	YES	0.1	0.6	YES	Mutated
33	M	34	Corpus Callosum	YES	Multifocal	Biopsy	YES	YES	0.8	0.25	YES	Mutated
35	F	62	Corpus Callosum	NO	Multifocal	Biopsy	YES	YES	0.3	0.5	YES	Mutated
39	F	65	Right Fronto - Temporal	YES	1	Total resection	NO	NO	0.15	0.4	YES	Wild type
40	F	56	Right Fronto - Parietal	YES	1	Total resection (5-ALA)	YES	YES	0.5	0.2	YES	Wild type
41	M	58	Left Temporal	YES	Multifocal	Total resection (5-ALA)	YES	YES	0.3	0.5	YES	Wild type
42	F	69	Left Parieto - Occipital	NO	1	Total resection	YES	YES	0.2	0.4	YES	Mutated
43	M	68	Left Occipital	NO	1	Total resection (5-ALA)	YES	YES	0.2	0.2	YES	Wild type
45	F	38	Left Fronto - Parietal	NO	1	Total resection (5-ALA)	YES	YES	0.5	0.25	YES	Mutated
46	M	47	Left Temporal	NO	1	Total resection	YES	YES	0.15	0.2	YES	Mutated
47	M	61	Right Fronto - Temporal	NO	1	Total resection	YES	YES	0.5	0.5	YES	Wild type
48	M	45	Right Frontal	NO	1	Total resection (5-ALA)	YES	YES	0.2	0.7	YES	Wild type
51	M	56	Left Frontal	YES	1	Total resection	YES	YES	0.2	0.25	YES	Mutated
53	F	57	Right Temporo - Parietal	NO	1	Total resection	YES	YES	0.4	0.4	YES	Mutated
54	M	37	Right Temporal	NO	1	Total resection (5-ALA)	YES	YES	0.6	0.5	YES	Wild type
55	F	43	Right Parietal	NO	1	Total resection (5-ALA)	YES	YES	0.7	0.5	YES	Wild type
58	F	55	Left Frontal	NO	Multifocal	Biopsy	NO	YES	0.25	0.5	YES	Mutated
63	F	48	Left Fronto-Temporal	NO	1	Total resection (5-ALA)	NO	NO	Negative	0.2	YES	Wild type
64	M	65	Left Parietal	NO	1	Total resection (5-ALA+Awake surg)	YES	YES	0.2	0.3	YES	Wild type
