# Supplementary material for: The Chromatin-Oxygen Sensor Gene KDM5C Associates with Novel Hypoxia-Related Signatures in Glioblastoma Multiforme
Source: Int J Mol Sci. 2022 Sep 6;23(18):10250. doi: 10.3390/ijms231810250 (PMC9498997; doi:10.3390/ijms231810250)
Supplement: Supplementary file 1 [file ijms-23-10250-s001.zip › Table S4.pdf]

**Table S4.** Oligonucleotides used in this study.

| <b>Gene</b>     | <b>Forward (F) and Reverse (R)<br/>Sequence 5' to 3'</b> |
|-----------------|----------------------------------------------------------|
| <i>KDM5C</i>    | F_CTCCTTGCTACGCTCCCACTACGA<br>R_TCAAATGGACGTGTGTTACAC    |
| <i>BDNF</i>     | F_ACACAAAAGAAGGCTGCAGG<br>R_TGCTATCCATGGTAAGGGCC         |
| <i>NGF</i>      | F_GAGCAGCTTTCTATCCTGGC<br>R_TTCCGCCTGTATGCCGATC          |
| <i>P75</i>      | F_CTGTGGTTGTGGGCCTTGT<br>R_GCTGTCCACGGAGATGCC            |
| <i>HIF1A</i>    | F_TCCATGTGACCATGAGGAAA<br>R_AAGCTTCGCTGTGTGTTTTG         |
| <i>NESTIN</i>   | F_GCGGGCTACTGAAAAGTTCC<br>R_GCTGAGGGACATCTTGAGGT         |
| <i>OCT4</i>     | F_TTCGCAAGCCCTCATTTAC<br>R_CCATCACCTCCACCACCTG           |
| <i>SOX2</i>     | F_GCCGAGTGGAACCTTTTGTCTG<br>R_GGCAGCGTGTACTTATCCTTCT     |
| <i>NANOG</i>    | F_AGAAGGCCTCAGCACCTAC<br>R_GGCCTGATTGTTCCAGGA            |
| <i>SURVIVIN</i> | F_GGACCACCGCATCTCTACAT<br>R_GAAACACTGGGCCAAGTCTG         |
| <i>TREM2</i>    | F_CTCTCCGGCTGCTCATCTTA<br>R_TGGAGTCATAGGGGCAAGAC         |
| <i>IL-33</i>    | F_TGGCCTACCATCCCTTCTGACCC<br>R_CGTTTTGGCATCCAGAGGTCAGGT  |
| <i>IL-10</i>    | F_CCCAGACATCAAGGCGCATGTG<br>R_GTAGATGCCTTTCTCTTGGAGC     |
| <i>IL-6</i>     | F_CCCCTGACCCAACCACAAAT<br>R_ATTTGCCGAAGAGCCCTCAG         |
| <i>P53</i>      | F_CCTCAGCATCTTATCCGAGTGG<br>R_TGGATGGTGGTACAGTCAGAGC     |
| <i>TBP</i>      | F_GAGCTGTGATGTGAAGTTTCC<br>R_TCTGGGTTTGATCATTCTGTAG      |
| <i>18S</i>      | F_TCCCCATGAACGAGGAATTC<br>R_GGCCTCACTAAACCATCCAA         |
| <i>IDH-1</i>    | F_GGCTTGTGAGTGGATGGGTA<br>R_GCAAATCACATTATTGCCAAC        |
| <i>IDH-2</i>    | F_AGCCCATCATCTGCAAAAAC<br>R_CTCCACCCTGGCCTACCT           |
